# Supplementary material for: Excess Out-Of-Hospital Mortality and Declining Oxygen Saturation: The Sentinel Role of EMS Data in the COVID-19 Crisis in Tijuana, Mexico
Source: PubMed Central journal article supplement — medRxiv. 2020 May 19:2020.05.13.20098186. Preprint. [Version 2] doi: 10.1101/2020.05.13.20098186 (PMC7273286; doi:10.1101/2020.05.13.20098186), 2020-05-19
Supplement: 81700-2020.05.13.20098186-1.pdf [file 81700-2020.05.13.20098186-1.pdf]

**Supplement for “Excess Out-Of-Hospital Mortality and Declining Oxygen Saturation: The Sentinel Role of EMS Data in the COVID-19 Crisis in Tijuana, Mexico”**

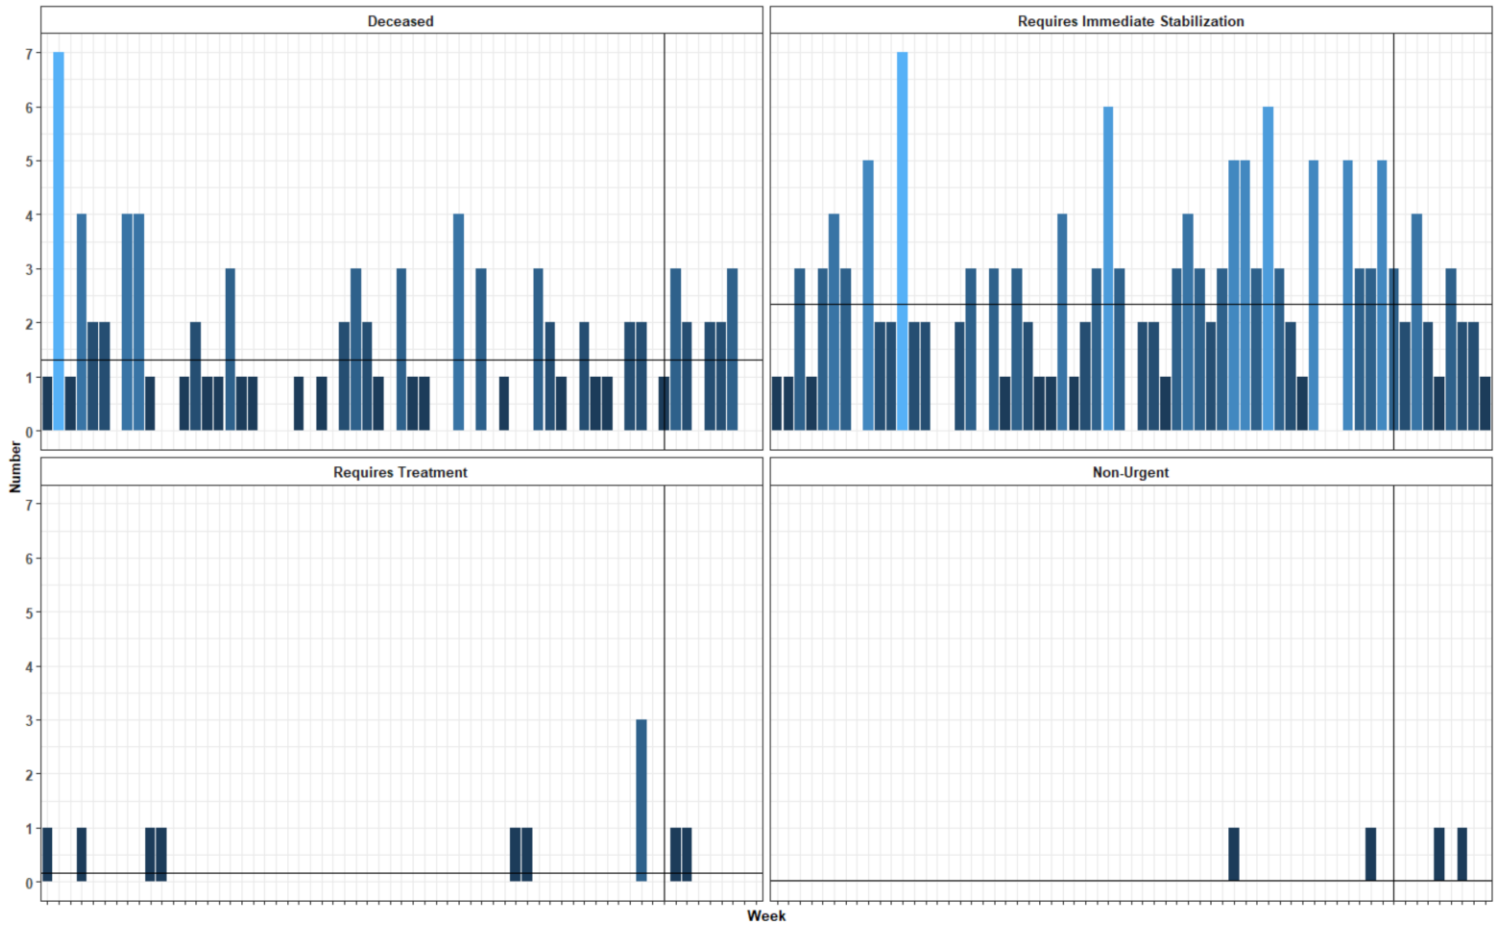

**Supplemental Figure 1. Number of CPR Administrations by Triage Priority Code, 2019-2020**

The number of CPR administrations among non-trauma patients was visualized by triage priority code for 2019 through May 2020. The vertical black line marks the week of March 10<sup>th</sup> through March 16<sup>th</sup>. The 2019 average number of CPR administrations is shown with a horizontal black line for each category. Overall, a very low number of CPR applications was observed in this population, with no substantial differences noted during the observed peak COVID-19 period.

A) EMS-Documented Out-Of-Hospital Mortality (observed / expected)

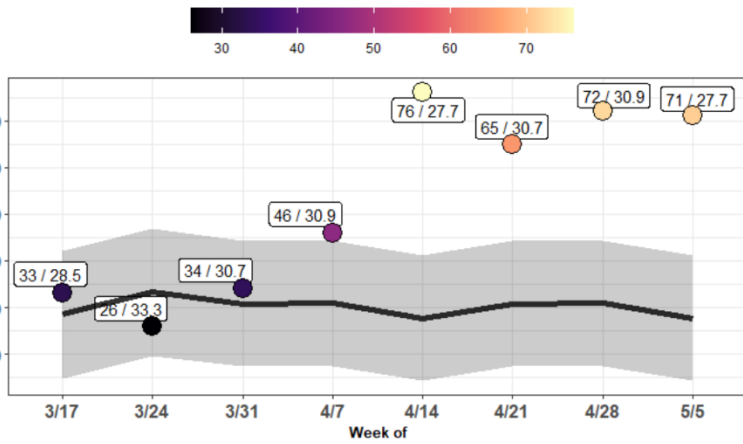

B) EMS-Documented Respiratory Cases (observed / expected)

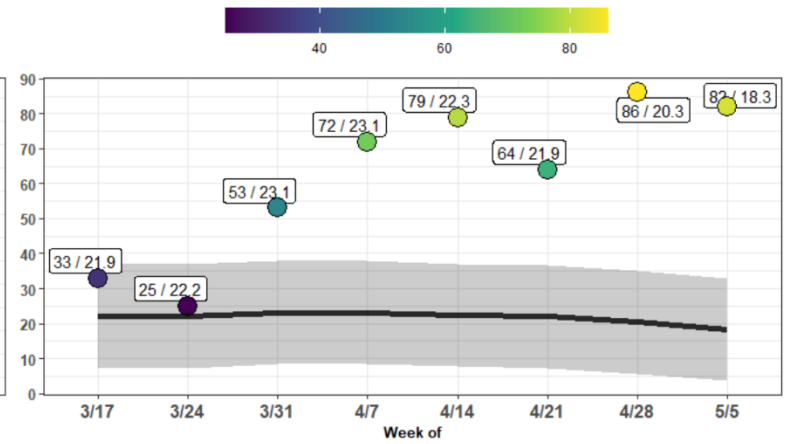

C) Official COVID-19 Deaths (reported as outpatient / total)

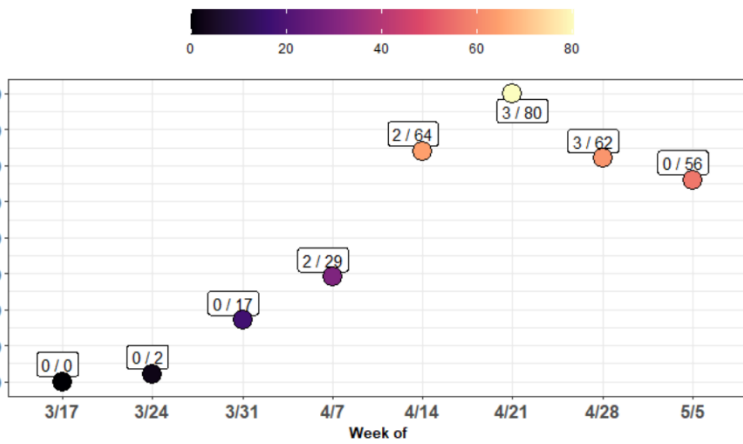

D) Official COVID-19 Cases (reported as outpatient / total)

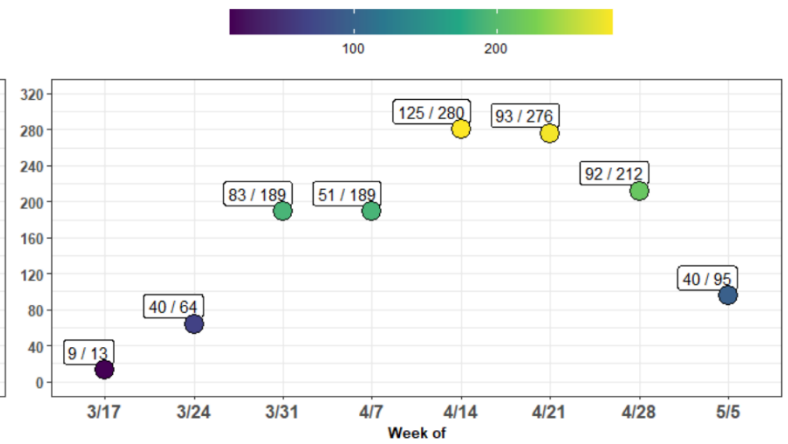

**Supplemental Figure 2. EMS-Documented Dead-On-Arrival Mortality and Respiratory Cases Compared to Official COVID-19 Case and Mortality Numbers, March 17<sup>th</sup> – May 11<sup>th</sup>**

A supplemental version of figure 3 in the main text, using only dead-on-arrival mortality. Shown as a sensitivity analysis. The results in the main text use all pre-hospital mortality, including dead-on-arrival (which are the majority) and individuals who died in transit.

A) EMS-Documented Out-Of-Hospital Mortality

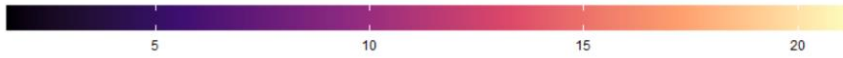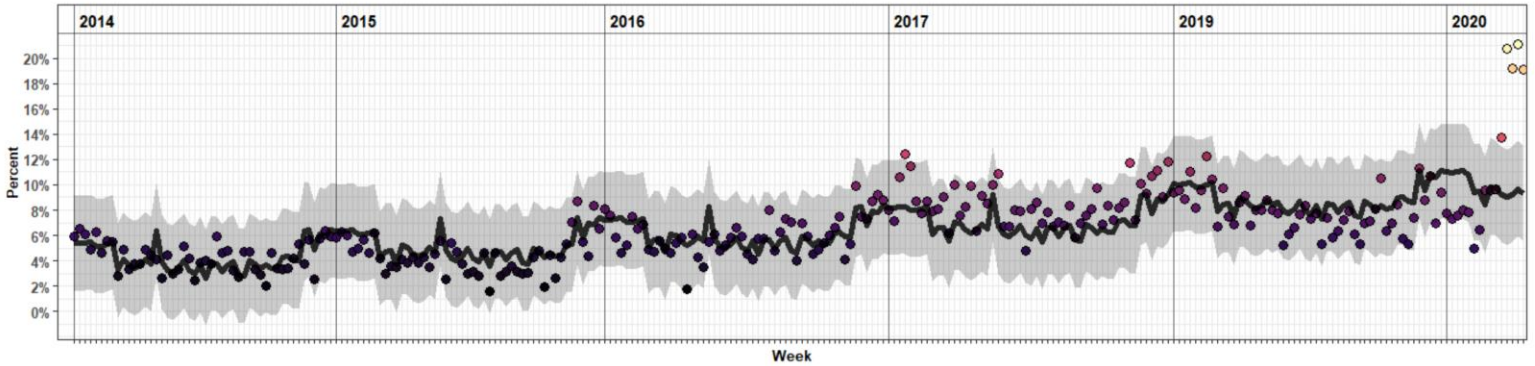

B) EMS-Documented Respiratory Cases

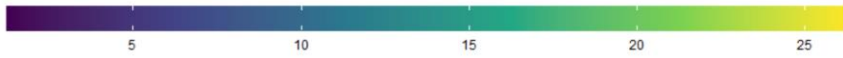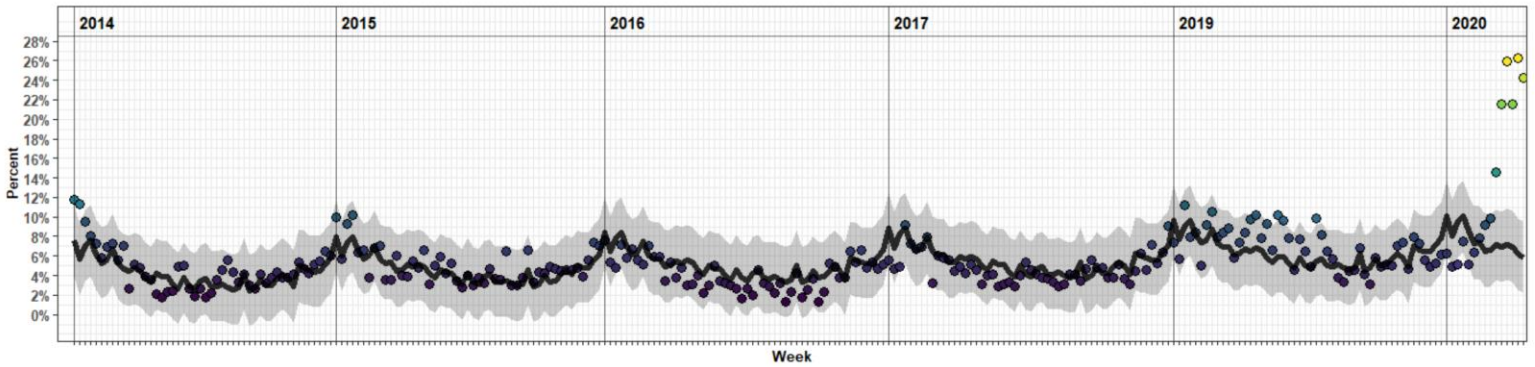

**Supplemental Figure 3. Long-Run EMS-Documented Out-Of-Hospital Mortality and Respiratory Percent of Cases, 2014-2020**  
A supplemental version of figure 2 in the main text using % of non-trauma caseload instead of total number of cases, to control for possible differences in overall volume. A) EMS-documented out-of-hospital mortality. B) EMS-documented respiratory cases. Parts A and B include expected values (black line) and 95% prediction intervals (grey band) based on model fit on data from 2014-2019, with forecasts through April of 2020. Both series exclude trauma-patients.

|                           | <b>0%-50%</b><br><b>(N=23)</b> | <b>50%-59%</b><br><b>(N=27)</b> | <b>60%-69%</b><br><b>(N=31)</b> | <b>70%-79%</b><br><b>(N=44)</b> | <b>80%-89%</b><br><b>(N=120)</b> | <b>90%-100%</b><br><b>(N=175)</b> |
|---------------------------|--------------------------------|---------------------------------|---------------------------------|---------------------------------|----------------------------------|-----------------------------------|
| <b>Week</b>               |                                |                                 |                                 |                                 |                                  |                                   |
| March 31 <sup>st</sup>    | 0 (0%)                         | 1 (3.7%)                        | 2 (6.5%)                        | 4 (9.1%)                        | 12 (10.0%)                       | 31 (17.7%)                        |
| April 7 <sup>th</sup>     | 3 (13.0%)                      | 5 (18.5%)                       | 5 (16.1%)                       | 5 (11.4%)                       | 19 (15.8%)                       | 32 (18.3%)                        |
| April 14 <sup>th</sup>    | 3 (13.0%)                      | 2 (7.4%)                        | 7 (22.6%)                       | 8 (18.2%)                       | 29 (24.2%)                       | 27 (15.4%)                        |
| April 21 <sup>st</sup>    | 2 (8.7%)                       | 6 (22.2%)                       | 6 (19.4%)                       | 4 (9.1%)                        | 14 (11.7%)                       | 30 (17.1%)                        |
| April 28 <sup>th</sup>    | 8 (34.8%)                      | 5 (18.5%)                       | 5 (16.1%)                       | 15 (34.1%)                      | 25 (20.8%)                       | 27 (15.4%)                        |
| May 5 <sup>th</sup>       | 7 (30.4%)                      | 8 (29.6%)                       | 6 (19.4%)                       | 8 (18.2%)                       | 21 (17.5%)                       | 28 (16.0%)                        |
| <b>Age</b>                |                                |                                 |                                 |                                 |                                  |                                   |
| Mean (SD)                 | 58.7 (13.6)                    | 57.7 (14.0)                     | 58.5 (14.0)                     | 54.8 (13.4)                     | 54.7 (16.4)                      | 51.4 (18.8)                       |
| Median [Min, Max]         | 59.0 [35.0, 88.0]              | 55.0 [31.0, 89.0]               | 58.0 [22.0, 86.0]               | 57.0 [27.0, 81.0]               | 54.0 [24.0, 94.0]                | 50.0 [1.00, 97.0]                 |
| Missing                   | 0 (0%)                         | 0 (0%)                          | 0 (0%)                          | 0 (0%)                          | 0 (0%)                           | 0 (0%)                            |
| <b>Categorical Age</b>    |                                |                                 |                                 |                                 |                                  |                                   |
| 18-64: Adult              | 16 (69.6%)                     | 19 (70.4%)                      | 21 (67.7%)                      | 34 (77.3%)                      | 86 (71.7%)                       | 128 (73.1%)                       |
| 65+: Senior               | 7 (30.4%)                      | 8 (29.6%)                       | 10 (32.3%)                      | 10 (22.7%)                      | 34 (28.3%)                       | 42 (24.0%)                        |
| 0-18: Pediatric           | 0 (0%)                         | 0 (0%)                          | 0 (0%)                          | 0 (0%)                          | 0 (0%)                           | 5 (2.9%)                          |
| Missing                   | 0 (0%)                         | 0 (0%)                          | 0 (0%)                          | 0 (0%)                          | 0 (0%)                           | 0 (0%)                            |
| <b>Gender</b>             |                                |                                 |                                 |                                 |                                  |                                   |
| Female                    | 9 (39.1%)                      | 10 (37.0%)                      | 11 (35.5%)                      | 12 (27.3%)                      | 46 (38.3%)                       | 75 (42.9%)                        |
| Male                      | 14 (60.9%)                     | 17 (63.0%)                      | 20 (64.5%)                      | 32 (72.7%)                      | 74 (61.7%)                       | 100 (57.1%)                       |
| <b>Insurance</b>          |                                |                                 |                                 |                                 |                                  |                                   |
| IMSS                      | 14 (60.9%)                     | 16 (59.3%)                      | 19 (61.3%)                      | 25 (56.8%)                      | 85 (70.8%)                       | 117 (66.9%)                       |
| ISSSTE                    | 2 (8.7%)                       | 0 (0%)                          | 1 (3.2%)                        | 1 (2.3%)                        | 4 (3.3%)                         | 6 (3.4%)                          |
| Uninsured                 | 6 (26.1%)                      | 9 (33.3%)                       | 8 (25.8%)                       | 13 (29.5%)                      | 21 (17.5%)                       | 35 (20.0%)                        |
| Seg. Pop. INSABI          | 1 (4.3%)                       | 0 (0%)                          | 3 (9.7%)                        | 5 (11.4%)                       | 7 (5.8%)                         | 8 (4.6%)                          |
| Private                   | 0 (0%)                         | 2 (7.4%)                        | 0 (0%)                          | 0 (0%)                          | 3 (2.5%)                         | 9 (5.1%)                          |
| <b>Life Support</b>       |                                |                                 |                                 |                                 |                                  |                                   |
| Basic CPR                 | 1 (4.3%)                       | 0 (0%)                          | 0 (0%)                          | 0 (0%)                          | 2 (1.7%)                         | 0 (0%)                            |
| Missing                   | 22 (95.7%)                     | 27 (100%)                       | 31 (100%)                       | 44 (100%)                       | 118 (98.3%)                      | 175 (100%)                        |
| <b>Level of Concious.</b> |                                |                                 |                                 |                                 |                                  |                                   |
| Alert                     | 14 (60.9%)                     | 17 (63.0%)                      | 23 (74.2%)                      | 36 (81.8%)                      | 100 (83.3%)                      | 160 (91.4%)                       |
| Painful Stimulus          | 2 (8.7%)                       | 2 (7.4%)                        | 2 (6.5%)                        | 4 (9.1%)                        | 3 (2.5%)                         | 6 (3.4%)                          |
| Verbal Stimulus           | 6 (26.1%)                      | 5 (18.5%)                       | 0 (0%)                          | 2 (4.5%)                        | 7 (5.8%)                         | 6 (3.4%)                          |
| Unresponsive              | 0 (0%)                         | 0 (0%)                          | 3 (9.7%)                        | 1 (2.3%)                        | 5 (4.2%)                         | 0 (0%)                            |
| Missing                   | 1 (4.3%)                       | 3 (11.1%)                       | 3 (9.7%)                        | 1 (2.3%)                        | 5 (4.2%)                         | 3 (1.7%)                          |

### Supplemental Table 1. Characteristics of Respiratory Patients by Categorical SpO2

Numbers exclude trauma-related patients and pre-hospital deaths. Data are shown for the peak observed respiratory case period, from March 31<sup>st</sup> to May 11<sup>th</sup>.
